# Supplementary figures and images for: A scalable platform for the development of cell-type-specific viral drivers
Source: eLife journal article supplement (doi:10.7554/elife.48089), 2019-09-23

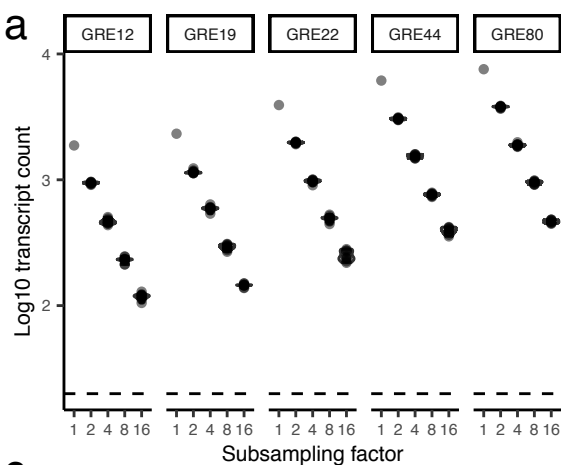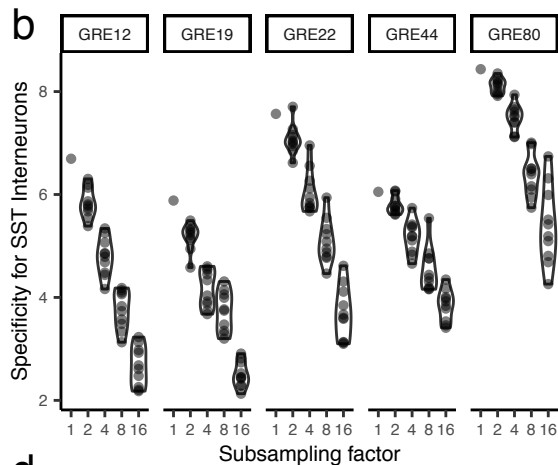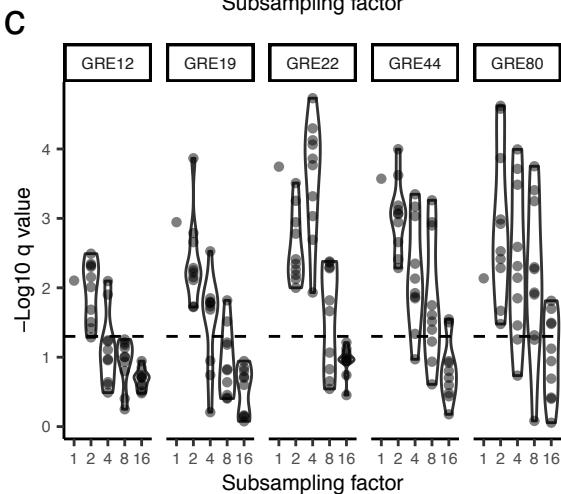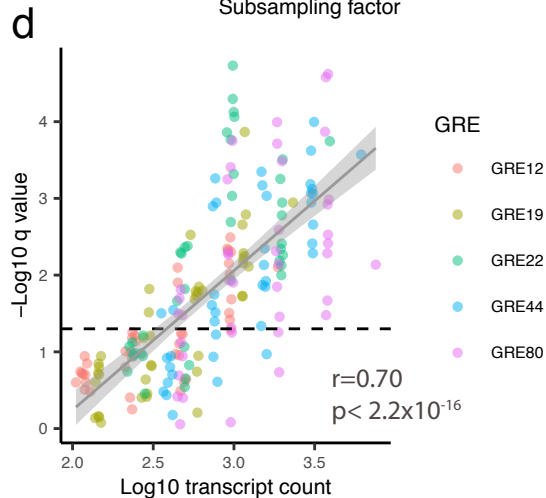

Supplement: supp [file elife-48089-supp-v1.zip]

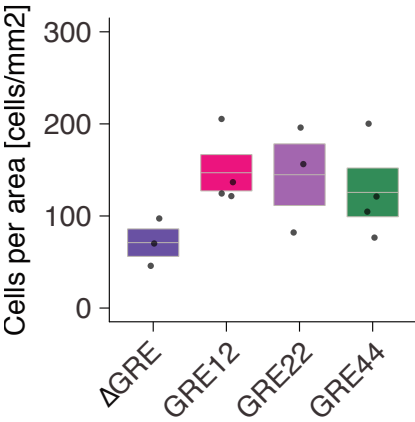

Supplement: supp [file elife-48089-supp-v1.zip]

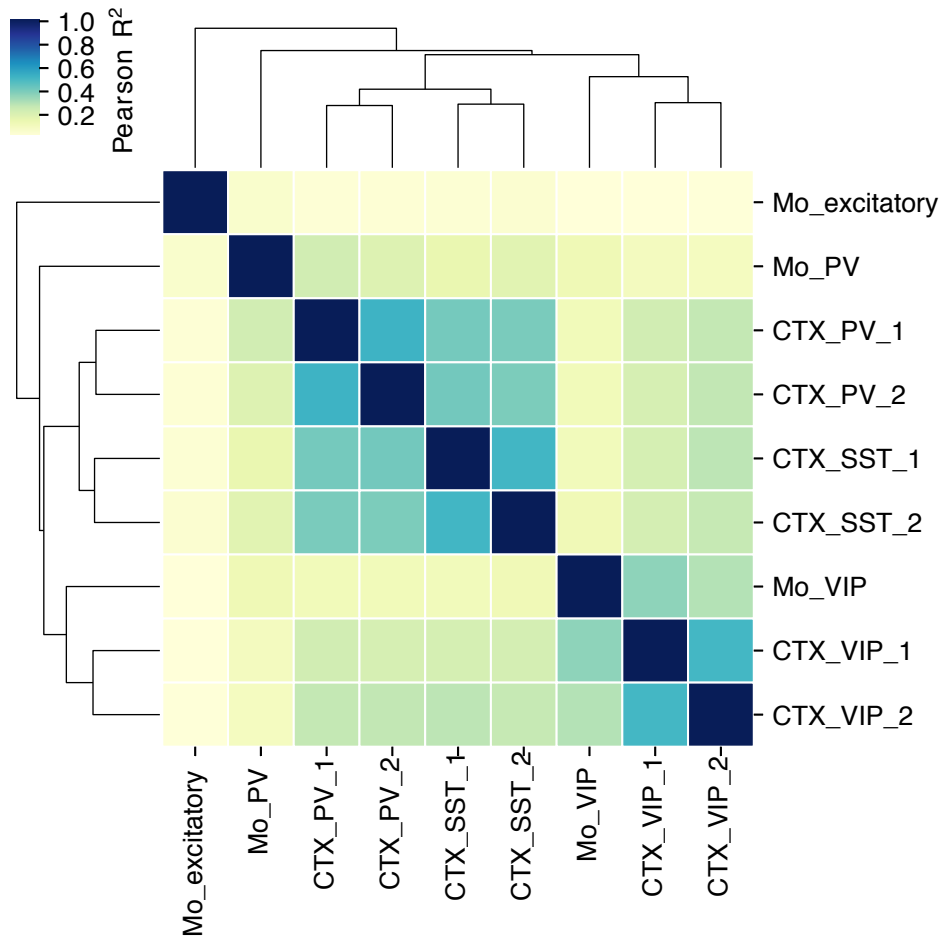

Supplement: supp [file elife-48089-supp-v1.zip]

Fraction of GFP+ cells in layer

SstCre;Ai14

GRE12

GRE22

GRE44

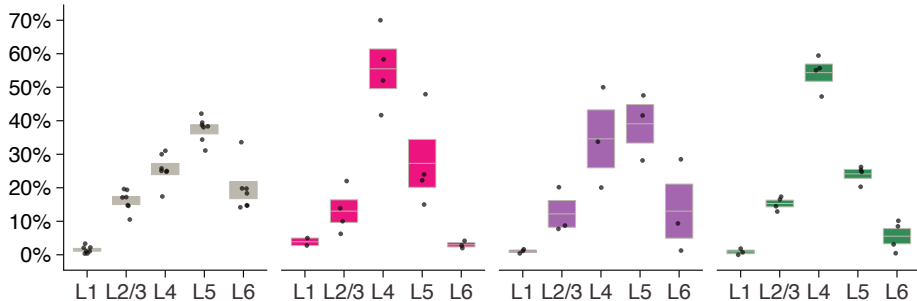

Supplement: supp [file elife-48089-supp-v1.zip]

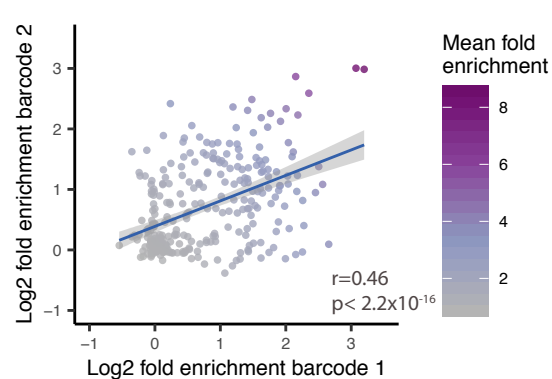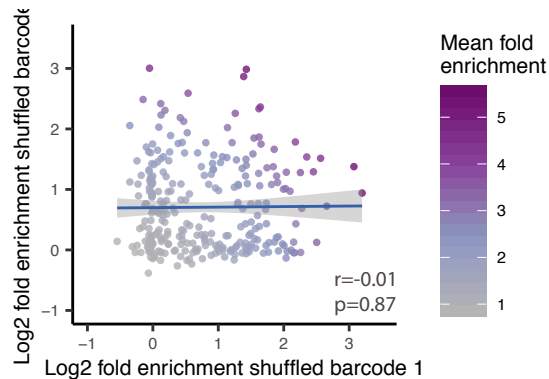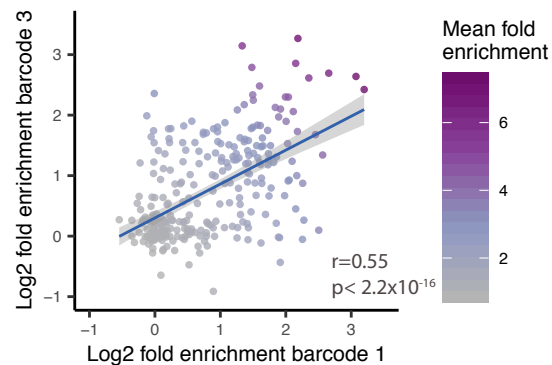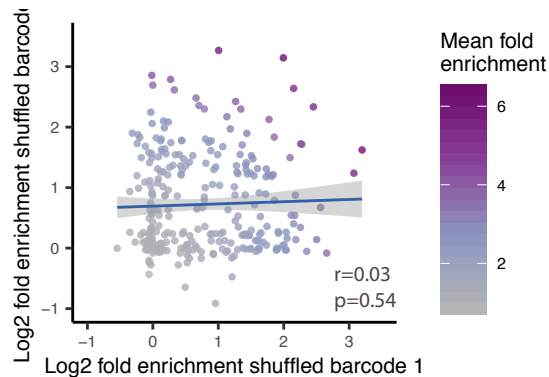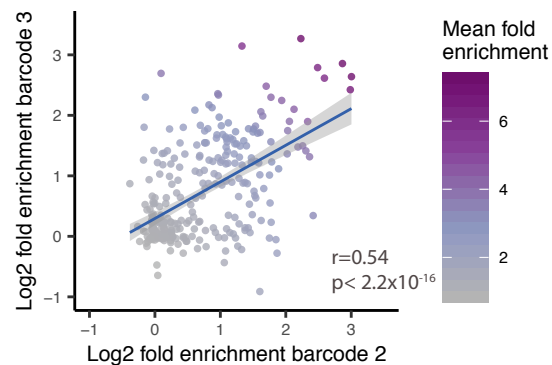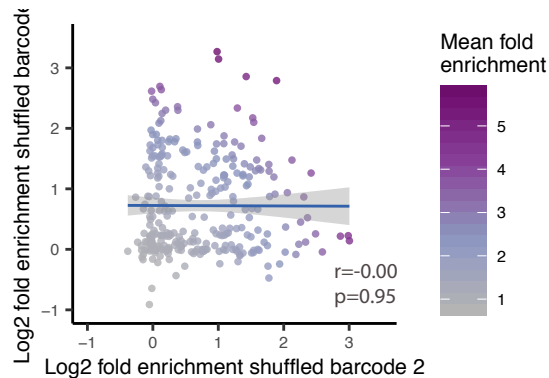

Supplement: supp [file elife-48089-supp-v1.zip]

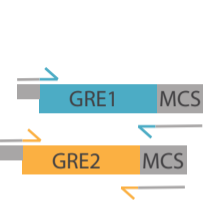

Genomic PCR

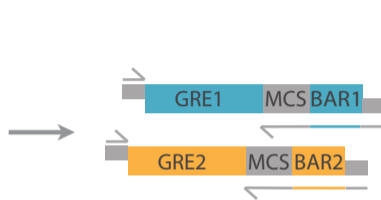

Barcoding PCR

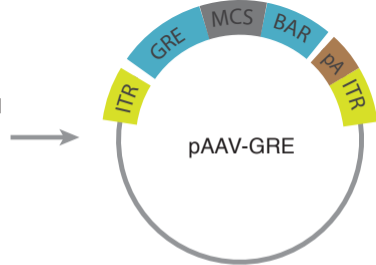

Cloning GRE pool into  
pAAV

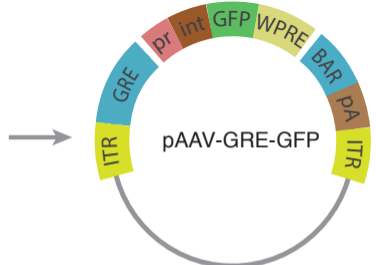

Insertion of expression  
cassette

Supplement: supp [file elife-48089-supp-v1.zip]

GRE-distal sequences

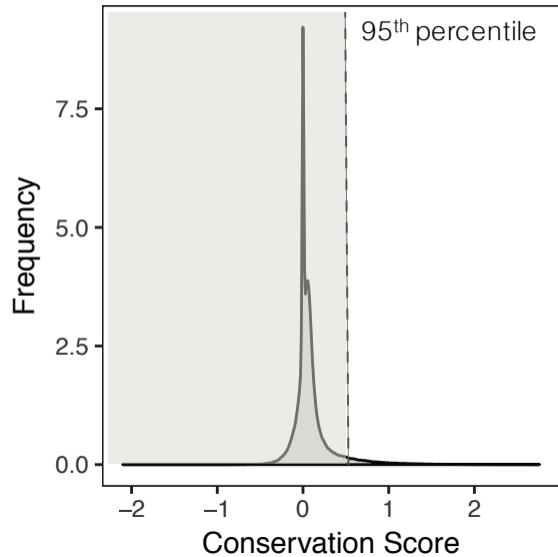

GRE sequences

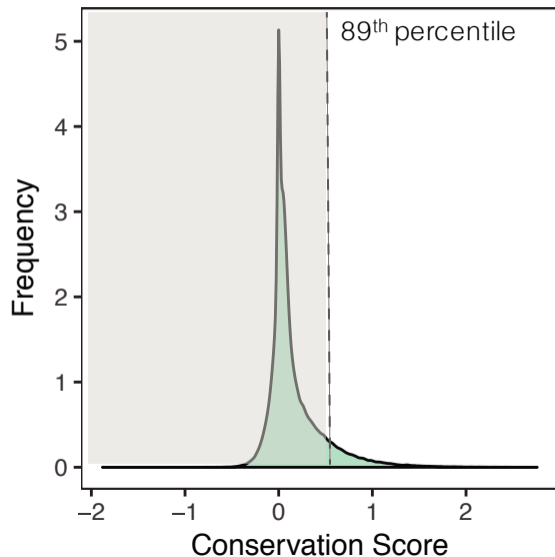

Supplement: supp [file elife-48089-supp-v1.zip]
